# Supplementary material
Source: publisher figshare collection journal article supplement (https://acs.figshare.com/ndownloader/files/13398305)
Supplement: Supplementary file 1 [file 13398305]

## Supporting Information

### **Small Synthetic Peptides Bioconjugated to Hybrid Gold Nanoparticles Destroy Potentially Deadly Bacteria in Submicromolar Concentration**

*Gianna Palmieri<sup>†°</sup>, Rosarita Tatè<sup>‡</sup>, Marta Gogliettino<sup>†</sup>, Marco Balestrieri<sup>†</sup>, Ilaria Rea<sup>§</sup>, Monica Terracciano<sup>§°</sup>, Yolande Therese Proroga<sup>¶</sup>, Federico Capuano<sup>¶</sup>, Aniello Anastasio<sup>^</sup> and Luca De Stefano<sup>§°\*</sup>*

<sup>†</sup>Institute of Biosciences and BioResources, UOS Na, National Research Council, Via Pietro Castellino 111, 80131 Naples Italy

<sup>‡</sup>Institute of Genetics and Biophysics, National Research Council, Via Pietro Castellino 111, 80131 Naples Italy

<sup>¶</sup>Department of Food Microbiology, Istituto Zooprofilattico Sperimentale del Mezzogiorno, via della Salute, 2, 80055 Portici (NA) Italy;

<sup>§</sup>Institute for Microelectronics and Microsystems, National Research Council, Via Pietro Castellino 111, 80131 Naples Italy;

<sup>°</sup>Materias S.r.l., Corso N. Protopisani n. 50, 80146 Naples, Italy

<sup>^</sup>Department of Veterinary Medicine and Animal Production, University of Naples Federico II, Via Federico Delpino 1, 80137 Naples Italy.

Correspondent author: Dr. L. De Stefano, Email: [luca.destefano@cnr.it](mailto:luca.destefano@cnr.it)

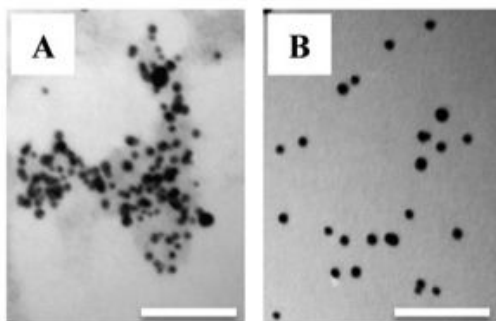

**Fig. S1.** TEM imaging of 1018K6-AuNPs stained with (A) or without (B) a protein-fixing agent.

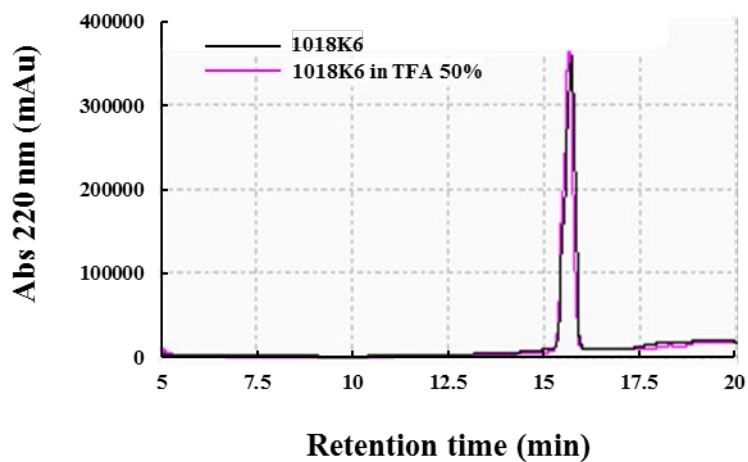

**Fig. S2.** Reverse-phase HPLC chromatography on C18 column of 1018K6 incubated in TFA 50% for 24 h at room temperature. 1018K6 incubated without TFA in the same experimental conditions, was used as control.

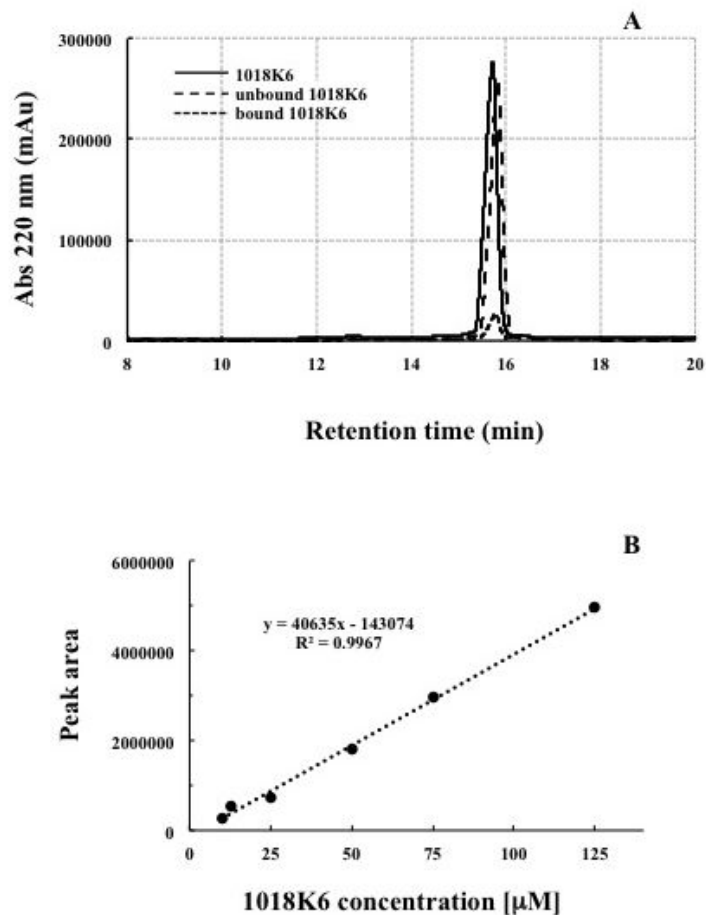

**Fig. S3.** Reverse-phase HPLC chromatography on a C18 column of 1018K6 free or bound to AuNPs (A). Calibration curve of C18 column obtained using different 1018K6 concentrations (B).

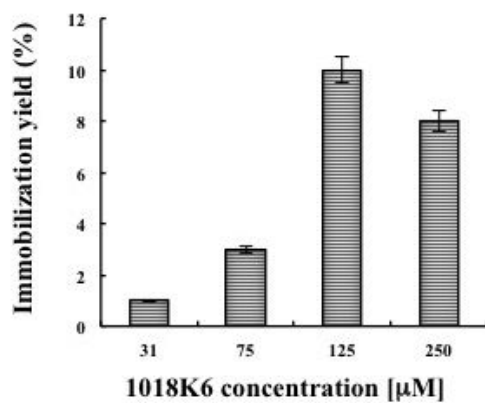

**Fig.S4.** Immobilization yield (%) of 1018K6 on AuNPs surface as function of peptide concentration.

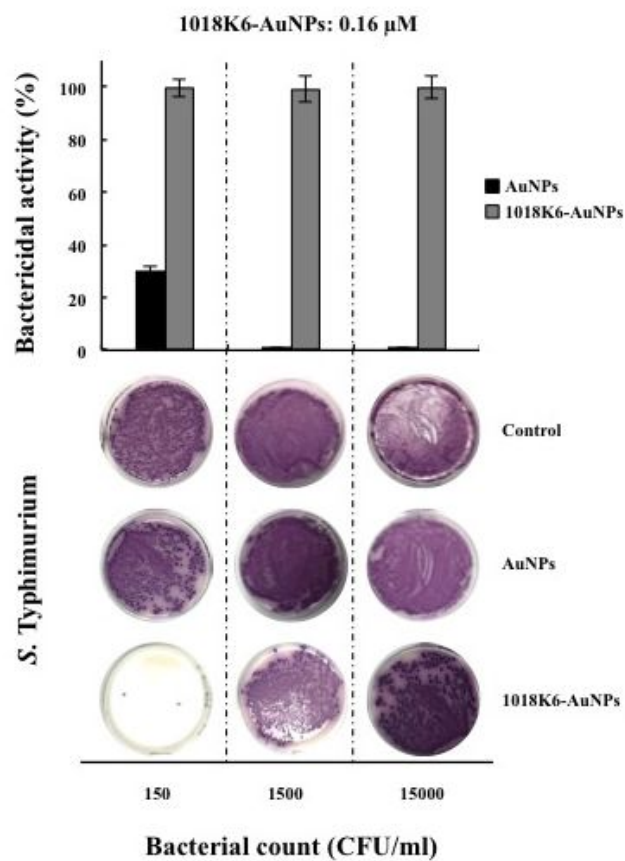

**Fig. S5.** Bactericidal activity of 1018K6-AuNPs against *S. Typhimurium* using a fixed concentration of the 1018K6-AuNPs (0.16  $\mu$ M) and increasing bacterial concentrations (CFU/ml).

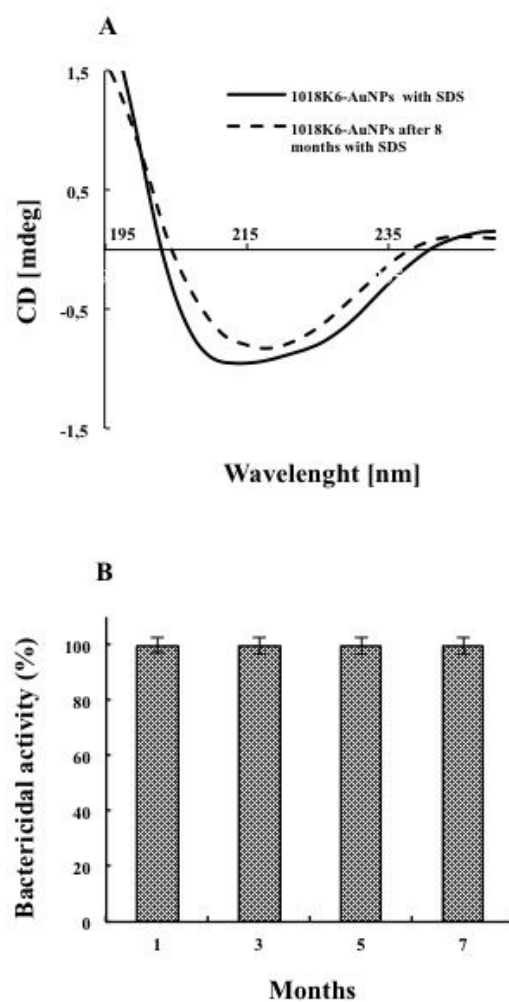

**Fig. S6.** Long-term conformational stability (A) and bactericidal activity (B) of 1018K6-AuNPs.

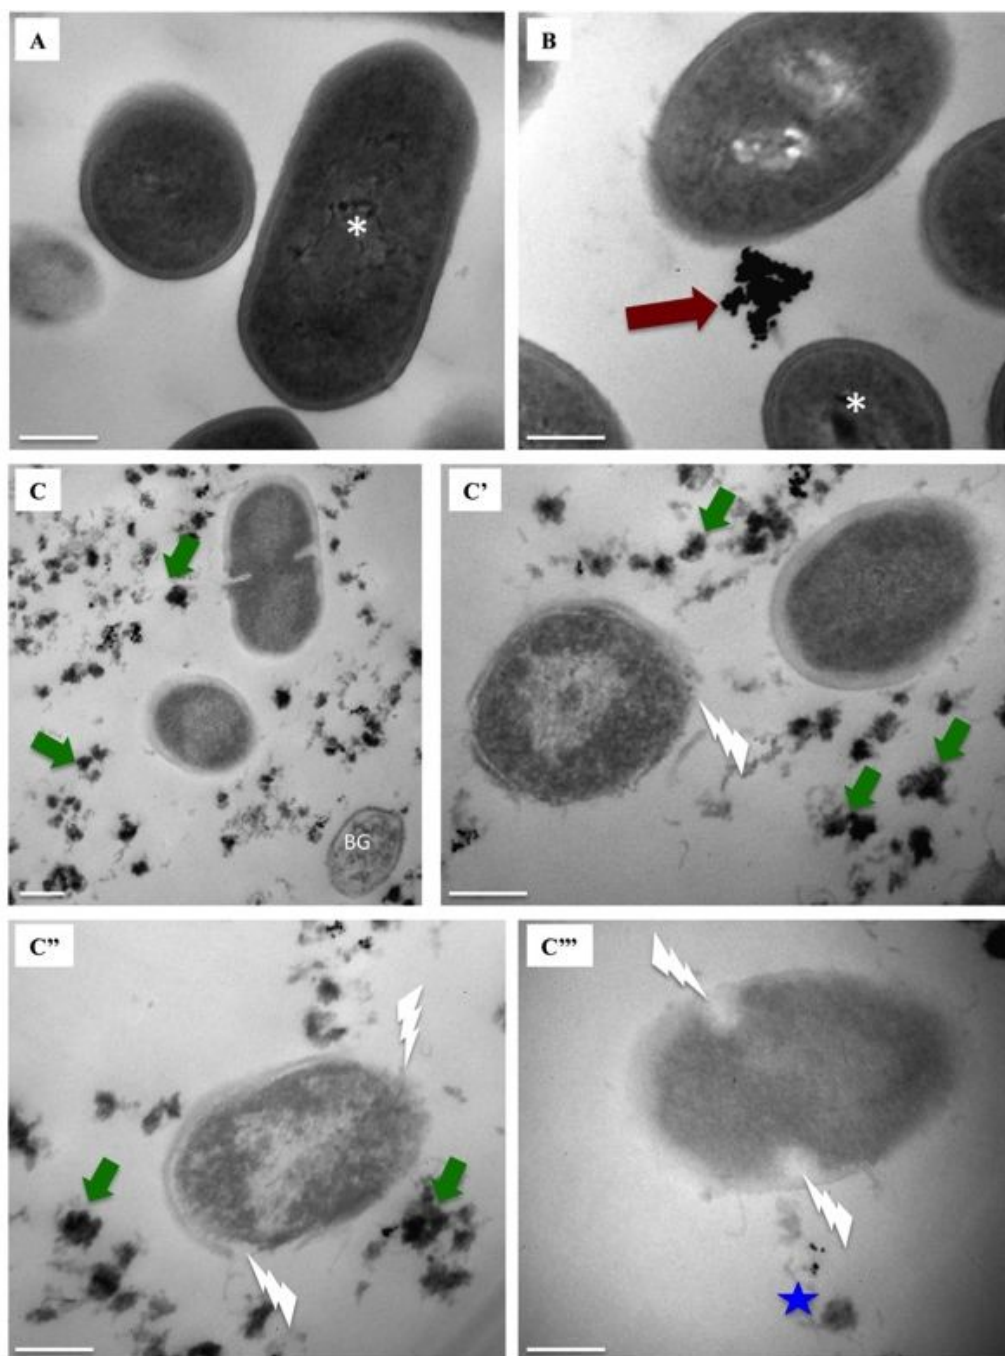

**Fig. S7.** TEM micrographs of *L. monocytogenes*. Cells untreated (A), treated for 6 h with AuNPs (B) or with 1018K6-AuNPs (C-C'-C''-C''') at 160 nM concentration. Red arrows showed AuNPs located outside of the *Listeria* cells. Green arrows indicate 1018K6-AuNPs mixed with cellular debris. White lightning in C'-C''-C''' clearly demonstrated the destabilization and destructuration of the cell membrane. The bacterial nucleoids were visible only in the untreated

and treated cells with AuNPs *Listeria* cells (Asterisk in A and B). The blue star points out that DNA exit from the cell occurs. The bar was equal to 200 nm.
